# Supplementary material for: Insulin-induced Effects on the Subcellular Localization of AKT1, AKT2 and AS160 in Rat Skeletal Muscle
Source: PubMed Central journal article supplement (PMC5155274; doi:10.1038/srep39230), 2016-12-14

## **Insulin-induced Effects on the Subcellular Localization of AKT1, AKT2 and AS160 in Rat Skeletal Muscle**

Xiaohua Zheng and Gregory D. Cartee

### **Supplementary**

**Figure 1.** *Effects of insulin and wortmannin on total AKT2 abundance in muscle. Values are expressed as mean  $\pm$ SD; n = 10 per treatment.*

### AKT2 (Total)

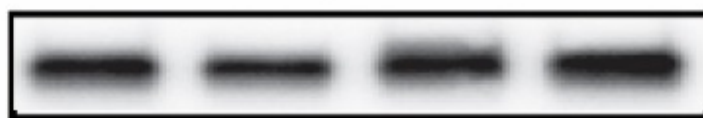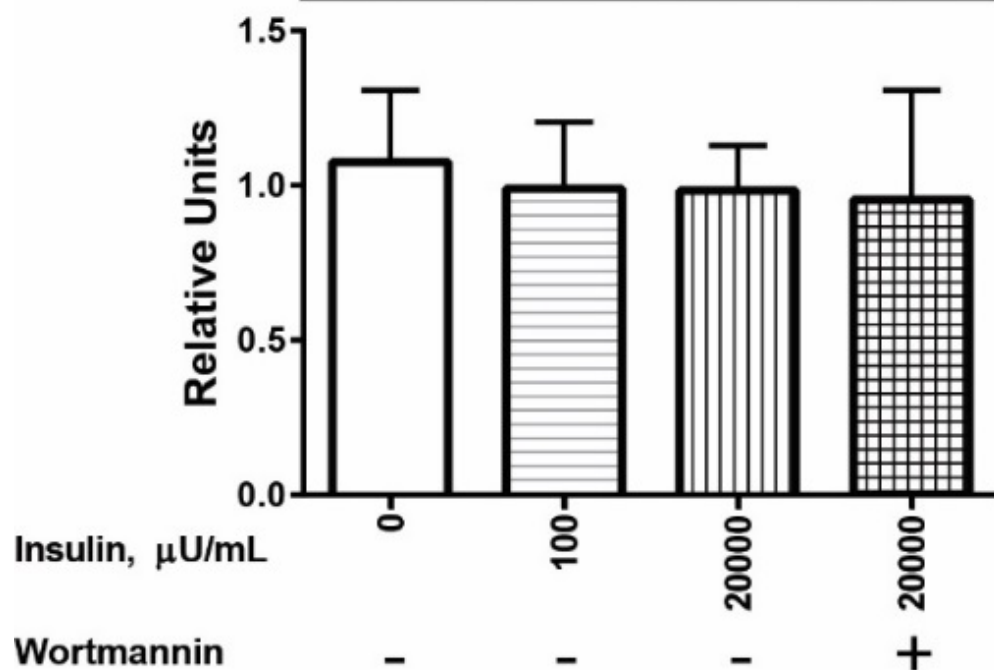

Supplement: srep39230-s1.pdf [file srep39230-s1.pdf]
